# Supplementary material for: Thermal Rearrangement of 5-(2-Hydroxy-6-oxocyclohexyl)-5H-chromeno[2,3-b]pyridines
Source: MDPI journal article supplement (doi:10.3390/molecules28073139), 2023-03-31
Supplement: s1 [file s1]

## Supplementary Material:

### Table of Contents

|                                                                                                   |     |
|---------------------------------------------------------------------------------------------------|-----|
| 1. The copies of $^1\text{H}$ NMR and $^{13}\text{C}$ NMR spectra for compounds <b>2a-c</b> ..... | S2  |
| 2. The copies of $^1\text{H}$ NMR and $^{13}\text{C}$ NMR spectra for compounds <b>3a-c</b> ..... | S5  |
| 3. $^{15}\text{N}$ and 2D NMR spectra for compound <b>2a</b> .....                                | S8  |
| 4. $^{15}\text{N}$ and 2D NMR spectra for compound <b>3a</b> .....                                | S10 |

# 1. The copies of $^1\text{H}$ NMR and $^{13}\text{C}$ NMR spectra for compounds 2a-c

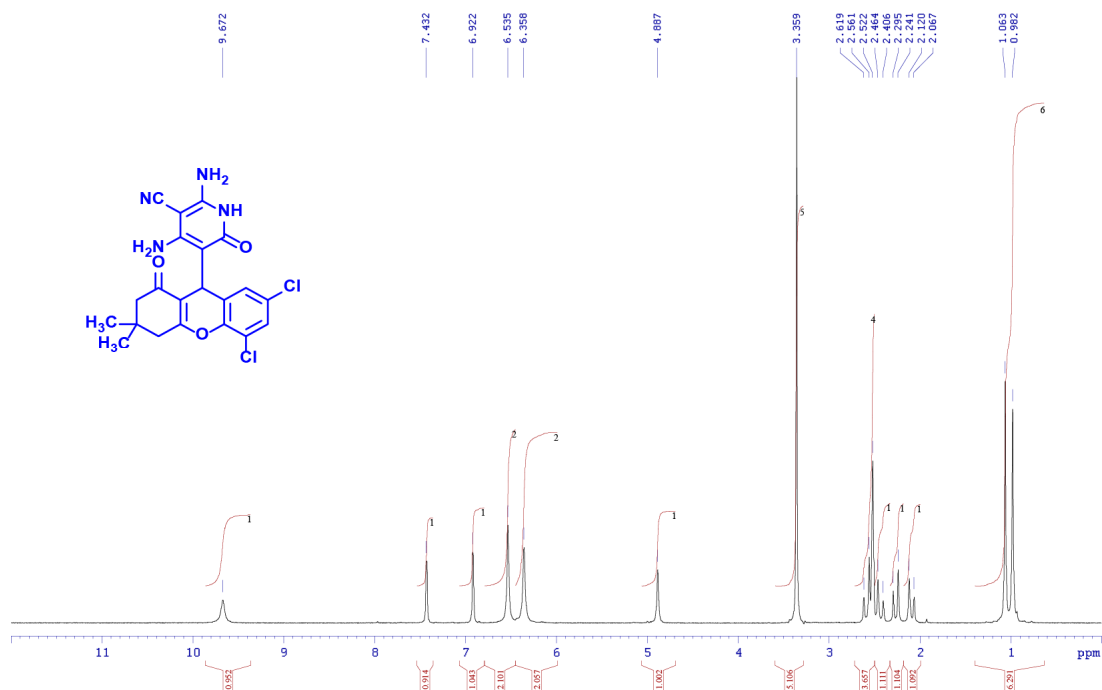

**Figure S1.**  $^1\text{H}$  NMR spectrum of 2,4-diamino-5-(5,7-dichloro-3,3-dimethyl-1-oxo-2,3,4,9-tetrahydro-1*H*-xanthen-9-yl)-6-oxo-1,6-dihydropyridine-3-carbonitrile **2a** in DMSO- $d_6$ .

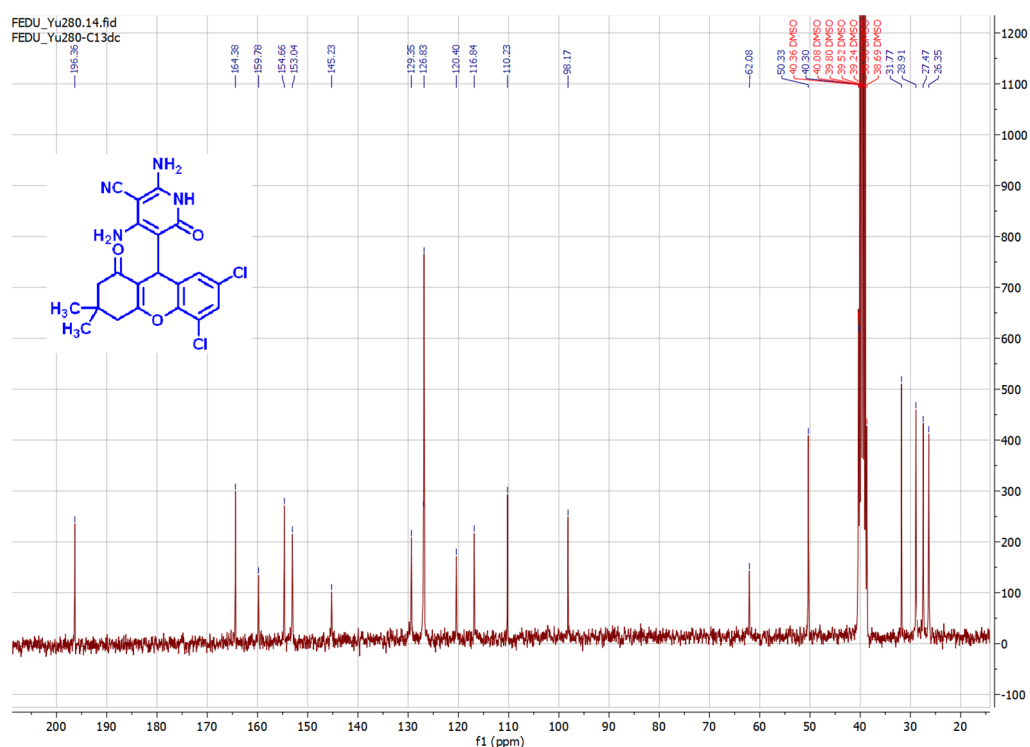

**Figure S2.**  $^{13}\text{C}$  NMR spectrum of 2,4-diamino-5-(5,7-dichloro-3,3-dimethyl-1-oxo-2,3,4,9-tetrahydro-1*H*-xanthen-9-yl)-6-oxo-1,6-dihydropyridine-3-carbonitrile **2a** in DMSO- $d_6$ .

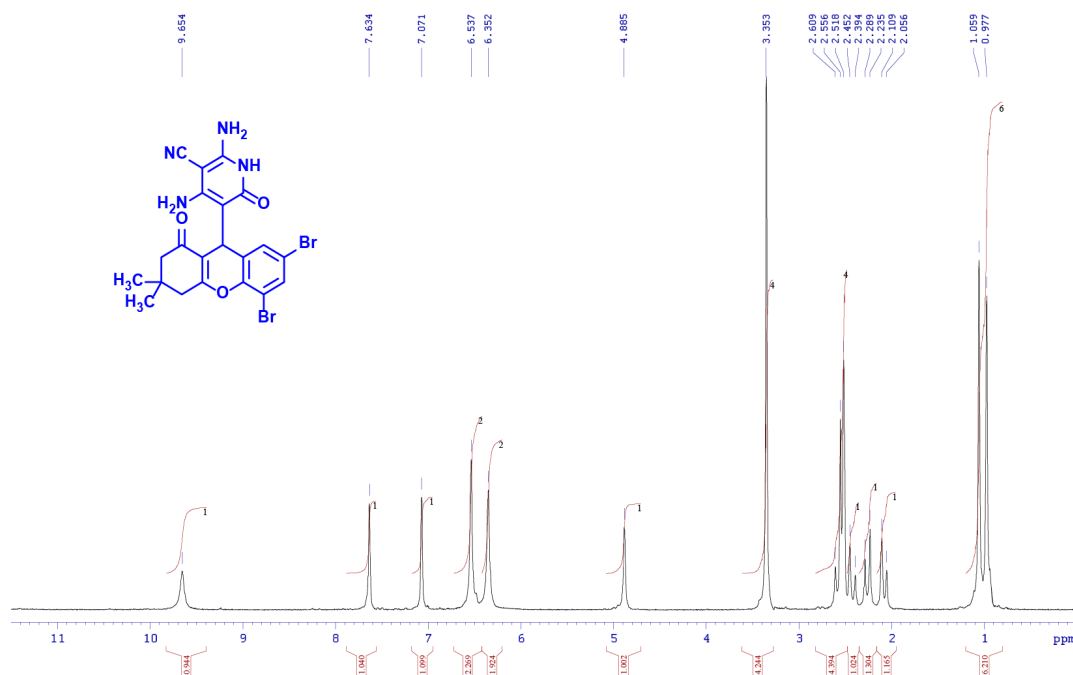

**Figure S3.** <sup>1</sup>H NMR spectrum of 2,4-diamino-5-(5,7-dibromo-3,3-dimethyl-1-oxo-2,3,4,9-tetrahydro-1*H*-xanthen-9-yl)-6-oxo-1,6-dihydropyridine-3-carbonitrile **2b** in DMSO-*d*<sub>6</sub>.

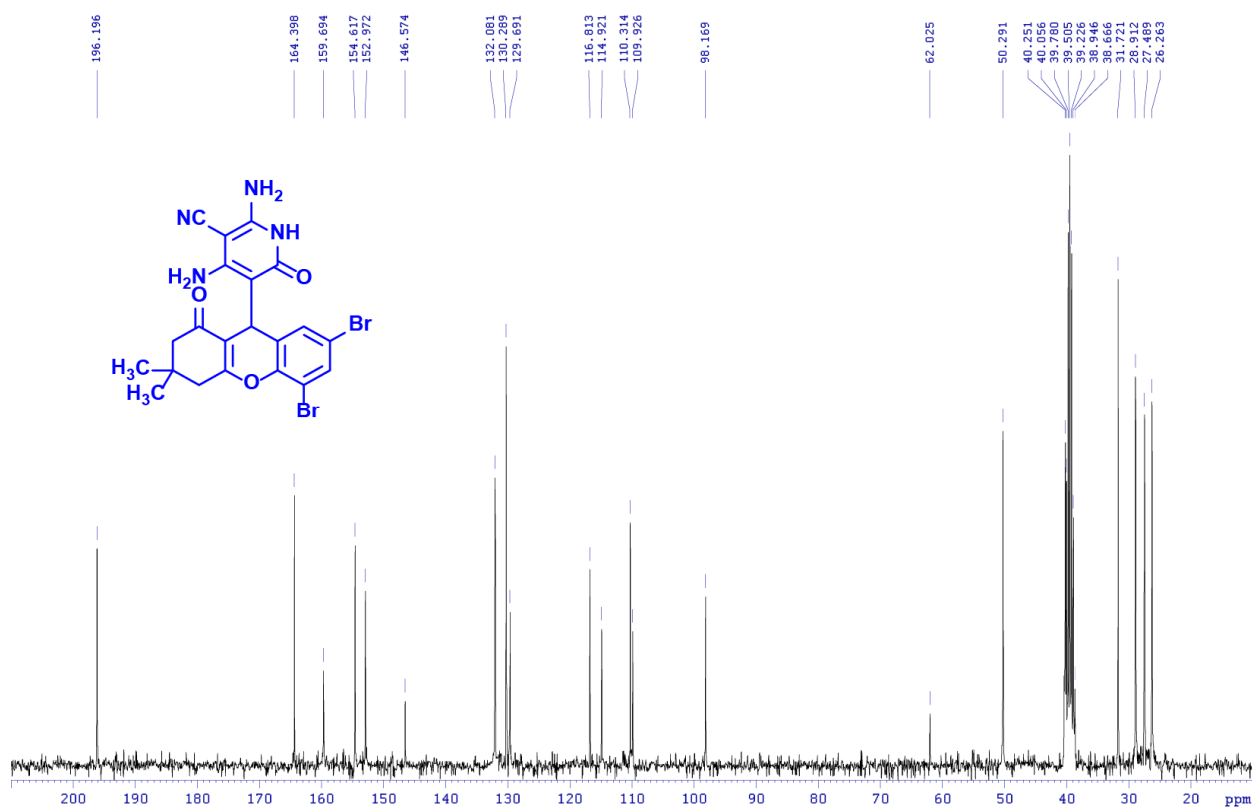

**Figure S4.** <sup>13</sup>C NMR spectrum of 2,4-diamino-5-(5,7-dibromo-3,3-dimethyl-1-oxo-2,3,4,9-tetrahydro-1*H*-xanthen-9-yl)-6-oxo-1,6-dihydropyridine-3-carbonitrile **2b** in DMSO-*d*<sub>6</sub>.

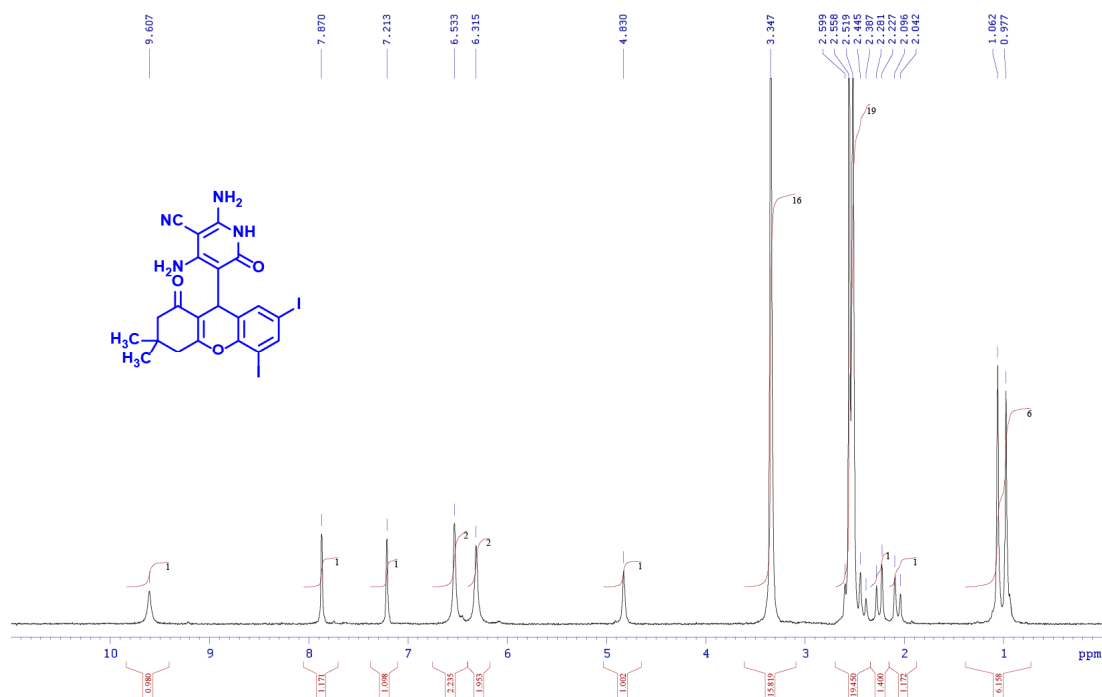

**Figure S5.**  $^1\text{H}$  NMR spectrum of 2,4-diamino-5-(5,7-diiodo-3,3-dimethyl-1-oxo-2,3,4,9-tetrahydro-1H-xanthen-9-yl)-6-oxo-1,6-dihydropyridine-3-carbonitrile **2c** in  $\text{DMSO}-d_6$ .

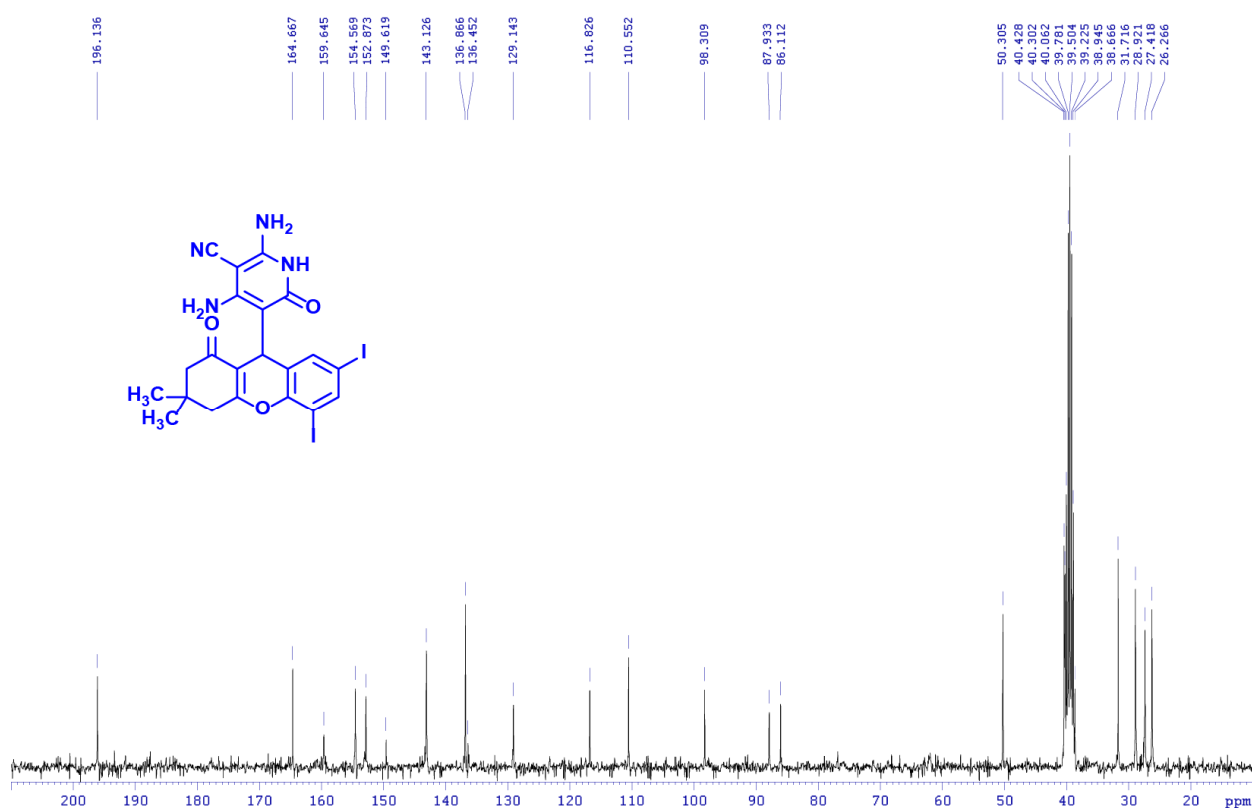

**Figure S6.**  $^{13}\text{C}$  NMR spectrum of 2,4-diamino-5-(5,7-diiodo-3,3-dimethyl-1-oxo-2,3,4,9-tetrahydro-1H-xanthen-9-yl)-6-oxo-1,6-dihydropyridine-3-carbonitrile **2c** in  $\text{DMSO}-d_6$ .

## 2. The copies of $^1\text{H}$ NMR and $^{13}\text{C}$ NMR spectra for compounds 3a-c

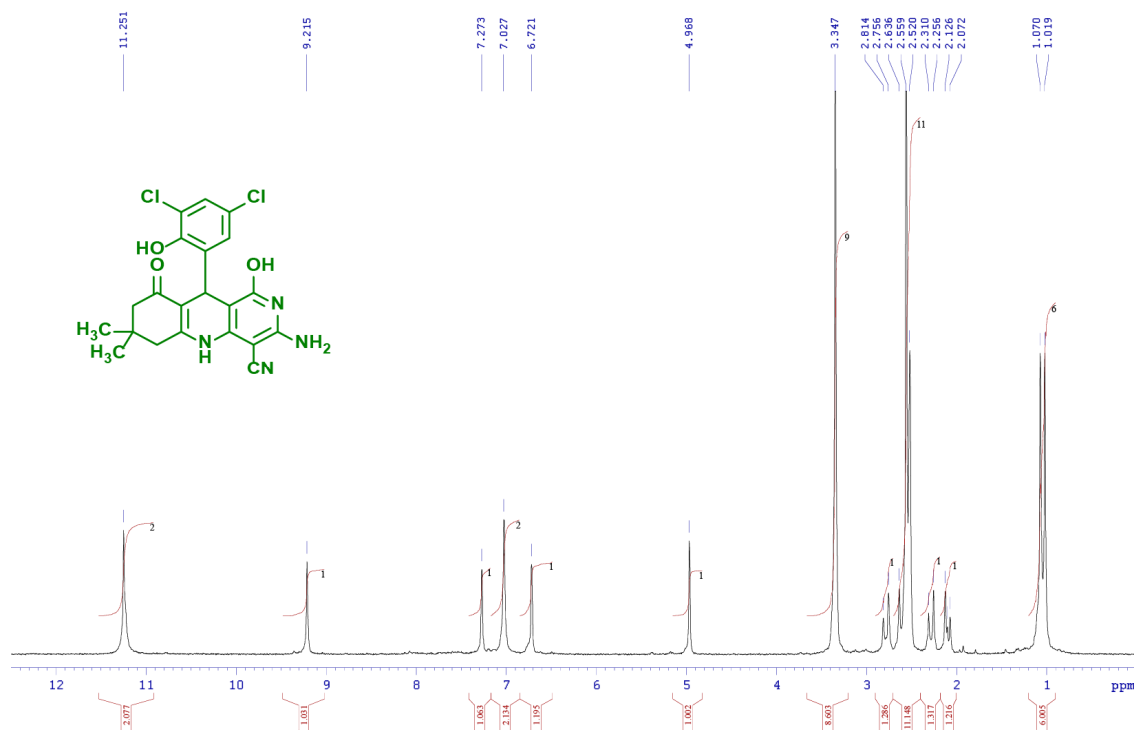

**Figure S7.**  $^1\text{H}$  NMR spectrum of 3-amino-10-(3,5-dichloro-2-hydroxyphenyl)-1-hydroxy-7,7-dimethyl-9-oxo-5,6,7,8,9,10-hexahydrobenzo[*b*][1,6]naphthyridine-4-carbonitrile **3a** in DMSO- $d_6$ .

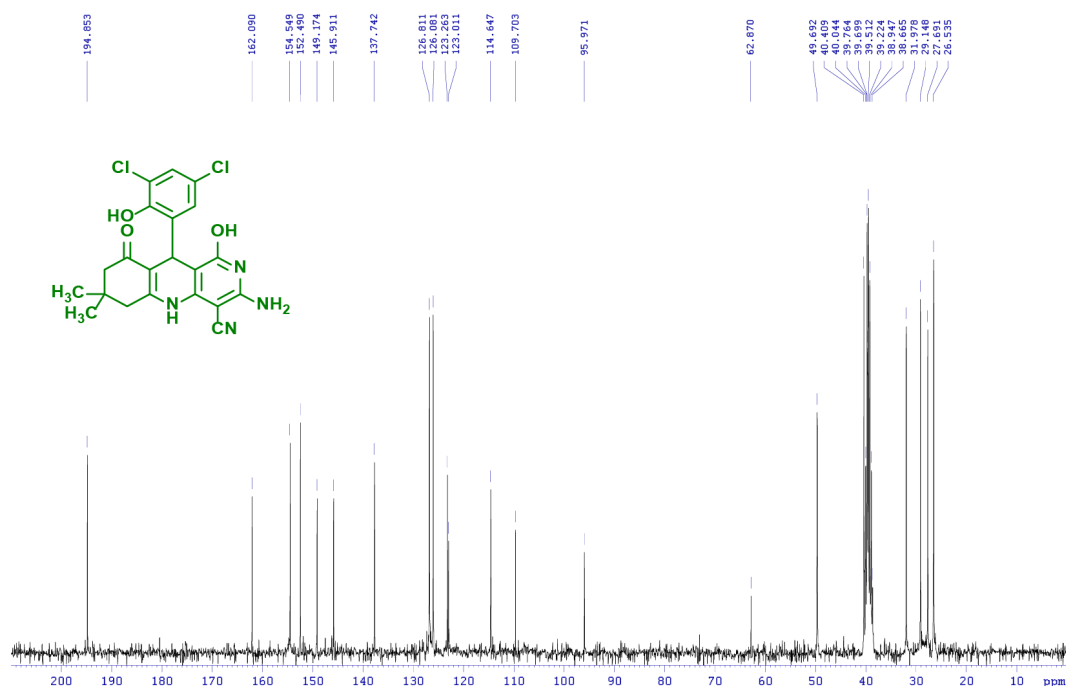

**Figure S8.**  $^{13}\text{C}$  NMR spectrum of 3-amino-10-(3,5-dichloro-2-hydroxyphenyl)-1-hydroxy-7,7-dimethyl-9-oxo-5,6,7,8,9,10-hexahydrobenzo[*b*][1,6]naphthyridine-4-carbonitrile **3a** in DMSO- $d_6$ .

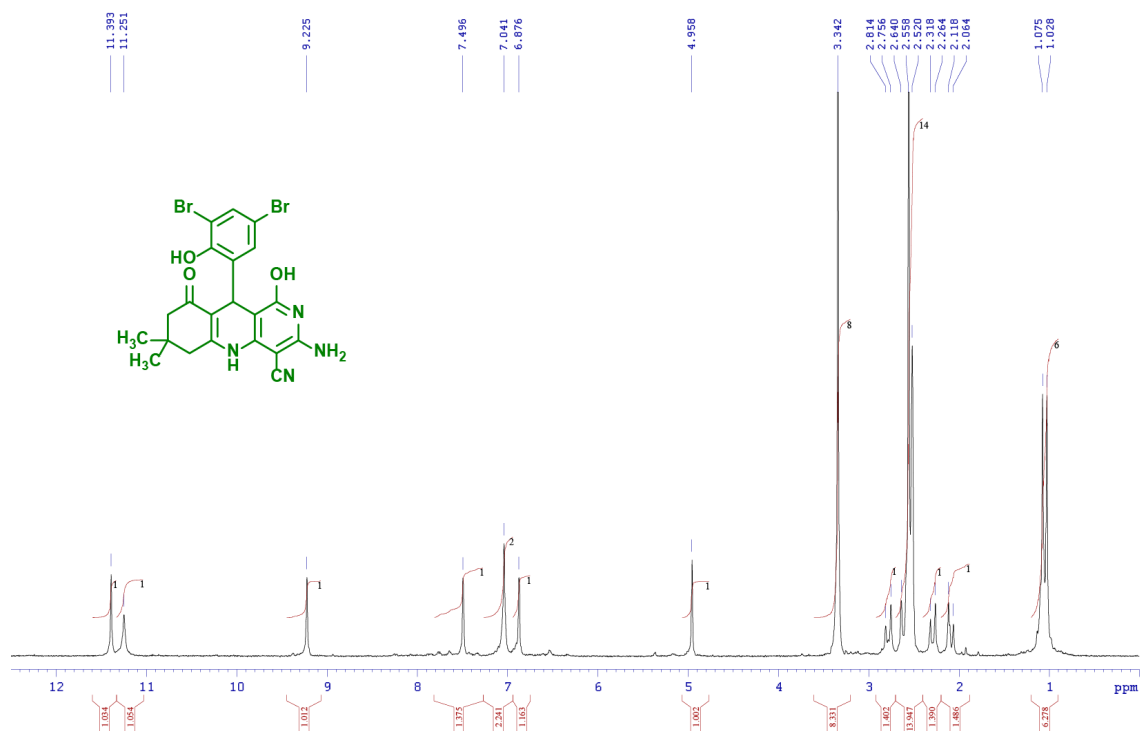

**Figure S9.**  $^1\text{H}$  NMR spectrum of 3-amino-10-(3,5-dibromo-2-hydroxyphenyl)-1-hydroxy-7,7-dimethyl-9-oxo-5,6,7,8,9,10-hexahydrobenzo[*b*][1,6]naphthyridine-4-carbonitrile **3b** in  $\text{DMSO-}d_6$ .

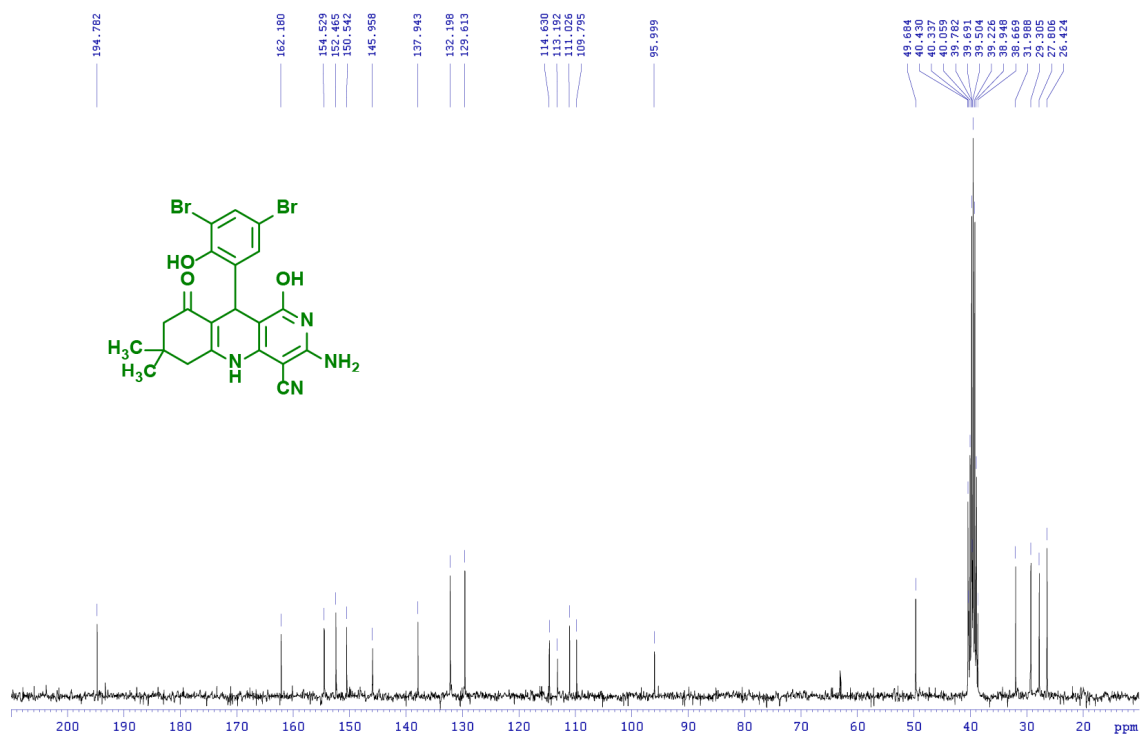

**Figure S10.**  $^{13}\text{C}$  NMR spectrum of 3-amino-10-(3,5-dibromo-2-hydroxyphenyl)-1-hydroxy-7,7-dimethyl-9-oxo-5,6,7,8,9,10-hexahydrobenzo[*b*][1,6]naphthyridine-4-carbonitrile **3b** in  $\text{DMSO-}d_6$ .

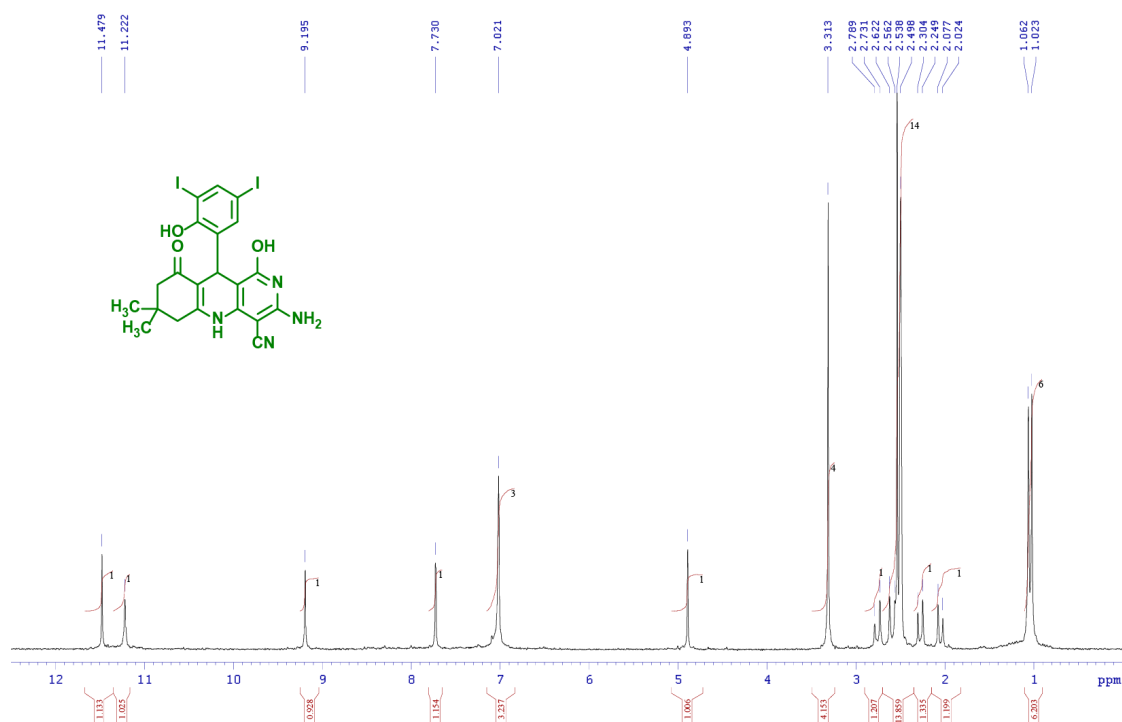

**Figure S11.** <sup>1</sup>H NMR spectrum of 3-amino-1-hydroxy-10-(2-hydroxy-3,5-diiodophenyl)-7,7-dimethyl-9-oxo-5,6,7,8,9,10-hexahydrobenzo[*b*][1,6]naphthyridine-4-carbonitrile **3c** in DMSO-*d*<sub>6</sub>.

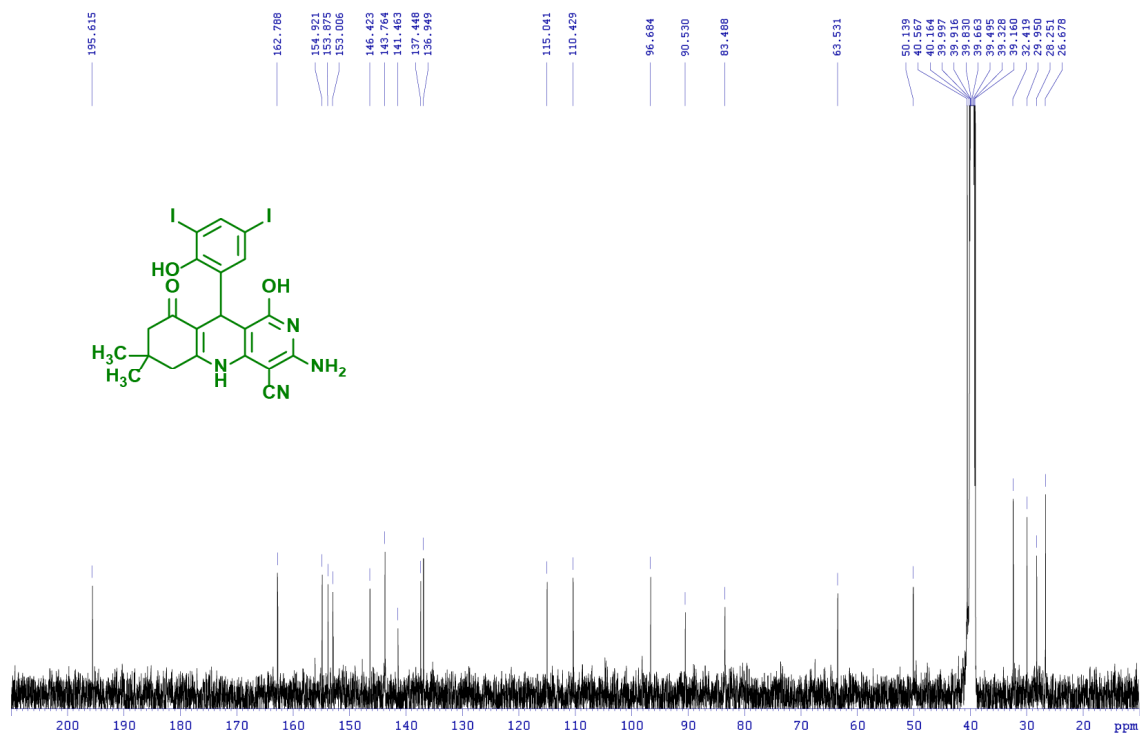

**Figure S12.** <sup>13</sup>C NMR spectrum of 3-amino-1-hydroxy-10-(2-hydroxy-3,5-diiodophenyl)-7,7-dimethyl-9-oxo-5,6,7,8,9,10-hexahydrobenzo[*b*][1,6]naphthyridine-4-carbonitrile **3c** in DMSO-*d*<sub>6</sub>.

### 3. $^{15}\text{N}$ and 2D NMR spectra for compound **2a**

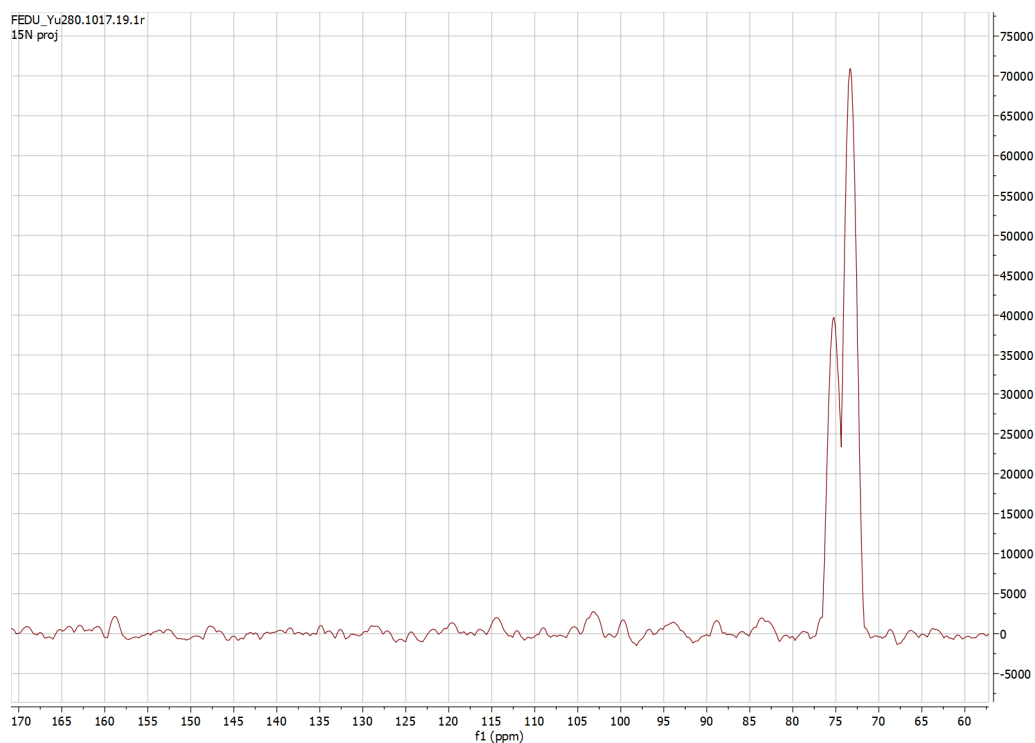

**Figure S13.**  $^{15}\text{N}$  NMR spectrum of 2,4-diamino-5-(5,7-dichloro-3,3-dimethyl-1-oxo-2,3,4,9-tetrahydro-1*H*-xanthen-9-yl)-6-oxo-1,6-dihydropyridine-3-carbonitrile **2a** in  $\text{DMSO-}d_6$ .

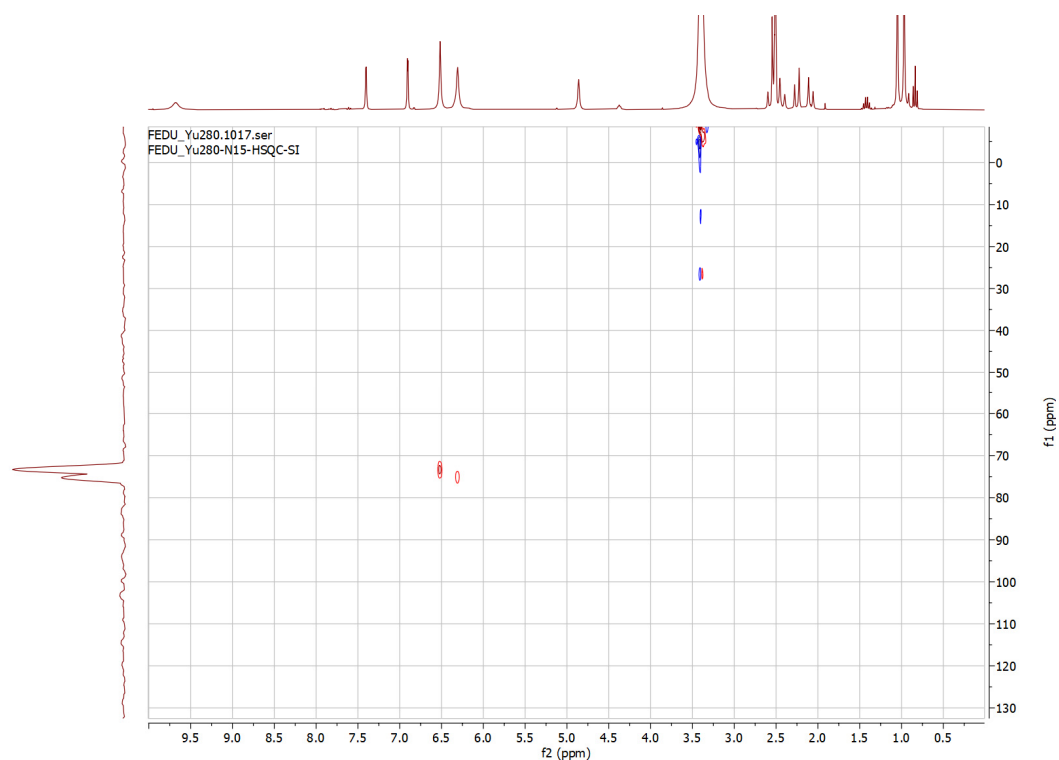

**Figure S14.**  $^1\text{H}$ - $^{15}\text{N}$  HSQC NMR spectrum of 2,4-diamino-5-(5,7-dichloro-3,3-dimethyl-1-oxo-2,3,4,9-tetrahydro-1*H*-xanthen-9-yl)-6-oxo-1,6-dihydropyridine-3-carbonitrile **2a** in  $\text{DMSO-}d_6$ .



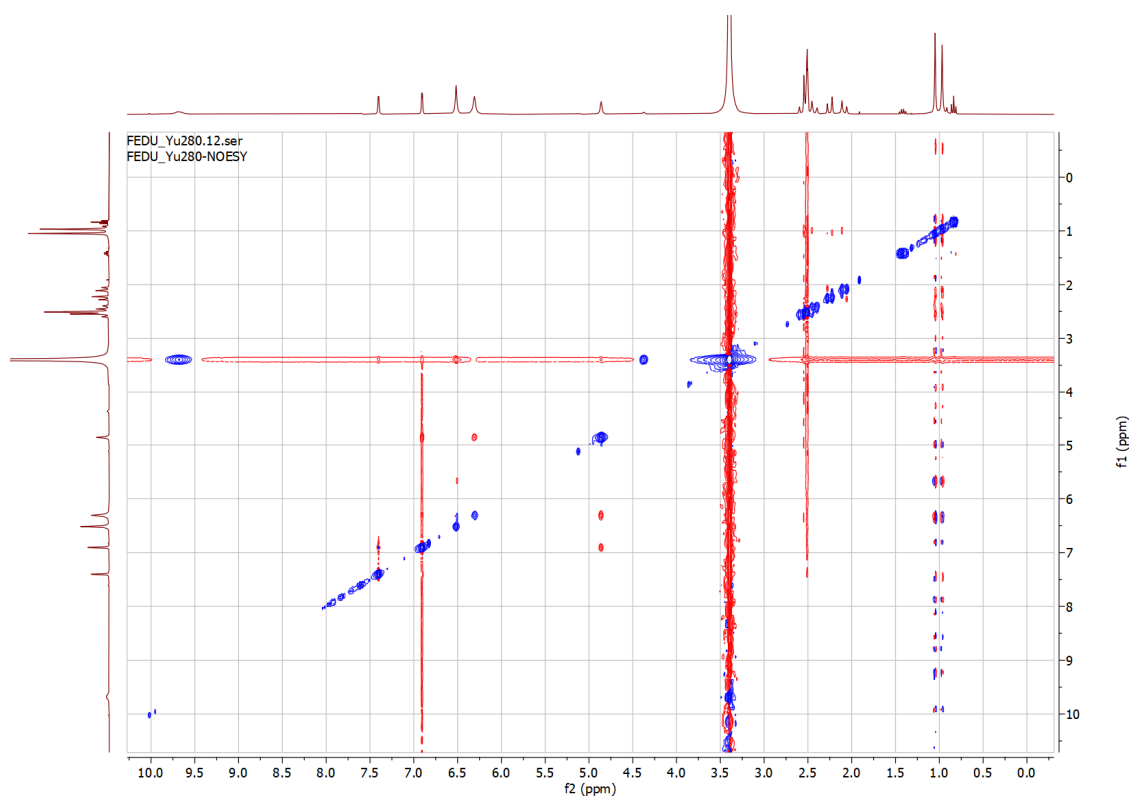

**Figure S15.**  $^1\text{H}$ - $^1\text{H}$  NOESY NMR spectrum of 2,4-diamino-5-(5,7-dichloro-3,3-dimethyl-1-oxo-2,3,4,9-tetrahydro-1*H*-xanthen-9-yl)-6-oxo-1,6-dihydropyridine-3-carbonitrile **2a** in  $\text{DMSO-}d_6$ .

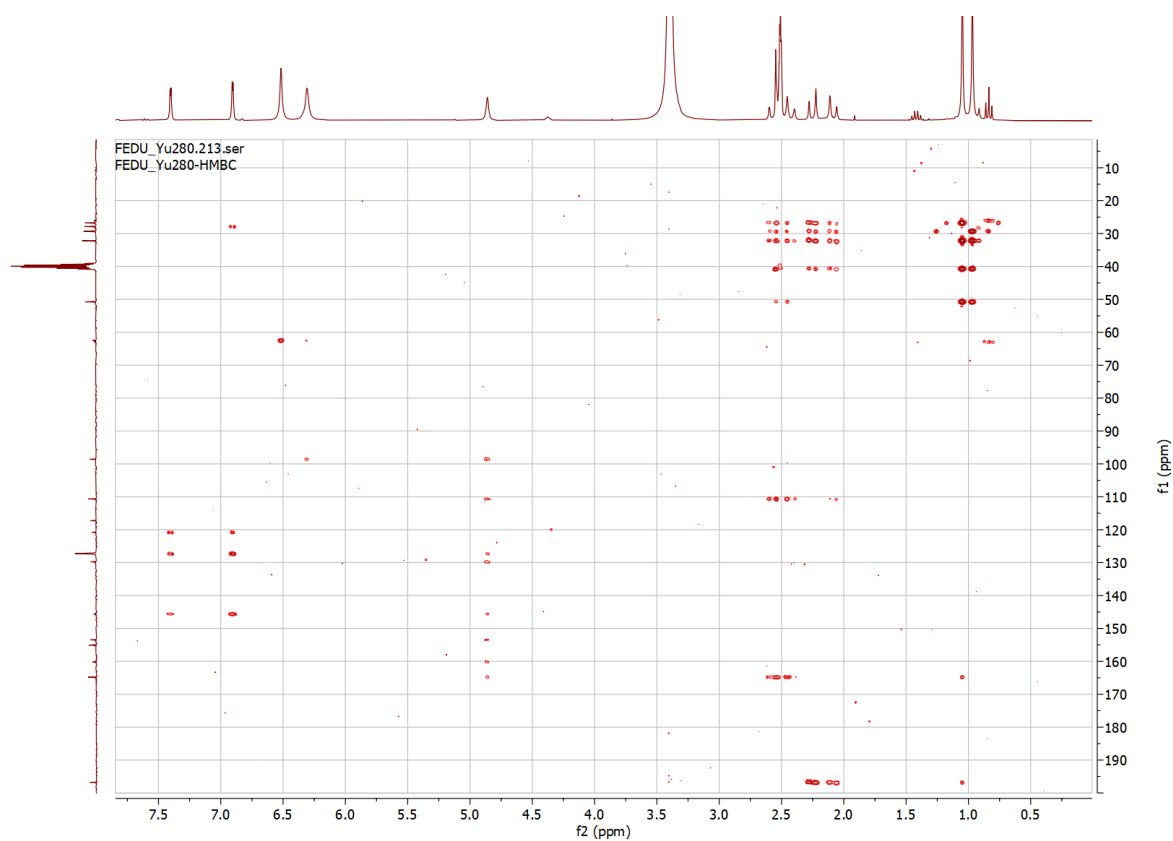

**Figure S16.**  $^1\text{H}$ - $^{13}\text{C}$  HMBC NMR spectrum of 2,4-diamino-5-(5,7-dichloro-3,3-dimethyl-1-oxo-2,3,4,9-tetrahydro-1*H*-xanthen-9-yl)-6-oxo-1,6-dihydropyridine-3-carbonitrile **2a** in  $\text{DMSO-}d_6$ .

#### 4. $^{15}\text{N}$ and 2D NMR spectra for compound **3a**

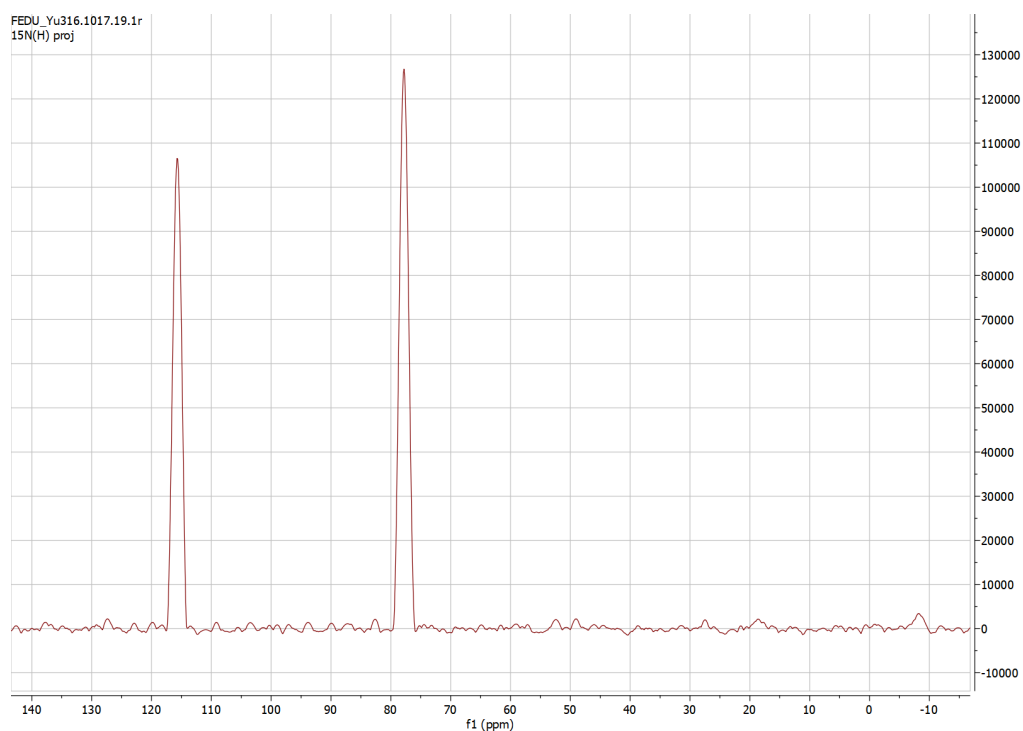

**Figure S17.**  $^{15}\text{N}$  NMR spectrum of 3-amino-10-(3,5-dichloro-2-hydroxyphenyl)-1-hydroxy-7,7-dimethyl-9-oxo-5,6,7,8,9,10-hexahydrobenzo[*b*][1,6]naphthyridine-4-carbonitrile **3a** in  $\text{DMSO-}d_6$ .

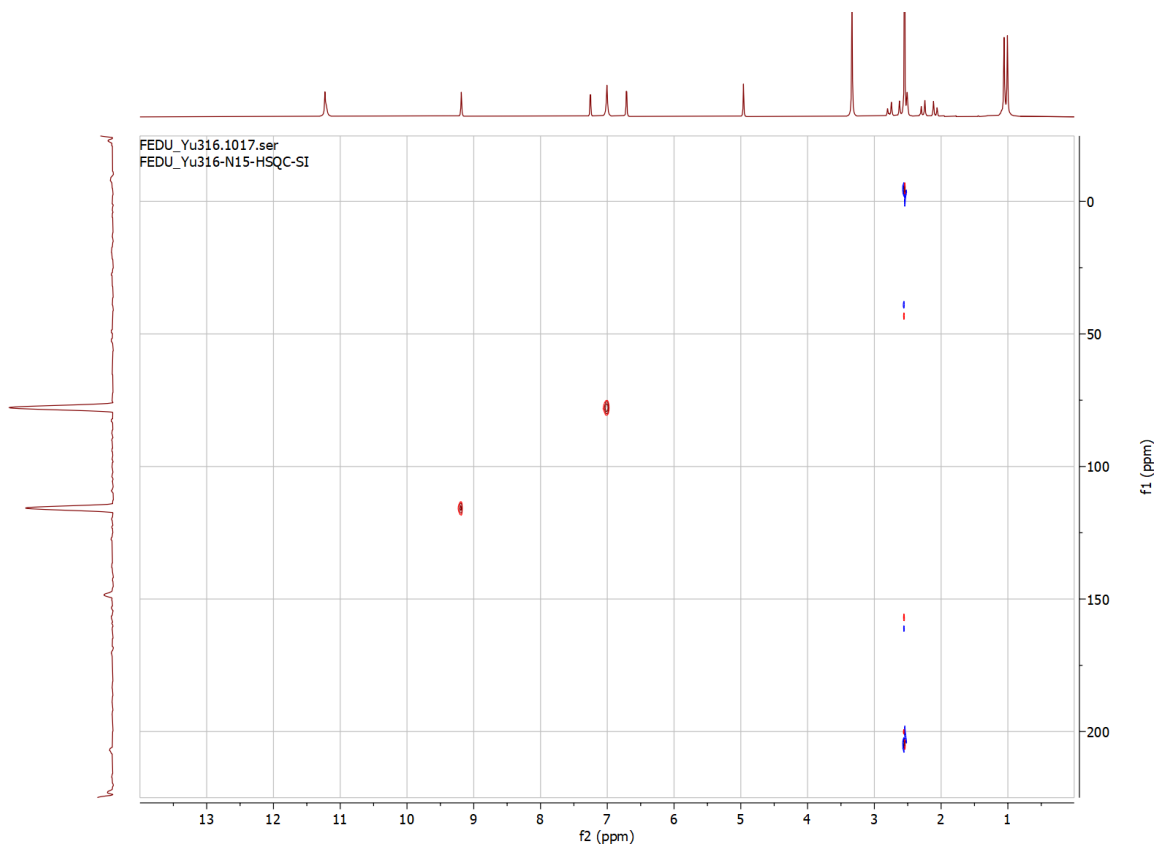

**Figure S18.**  $^1\text{H}$ - $^{15}\text{N}$  HSQC NMR spectrum of 3-amino-10-(3,5-dichloro-2-hydroxyphenyl)-1-hydroxy-7,7-dimethyl-9-oxo-5,6,7,8,9,10-hexahydrobenzo[*b*][1,6]naphthyridine-4-carbonitrile **3a** in  $\text{DMSO-}d_6$ .

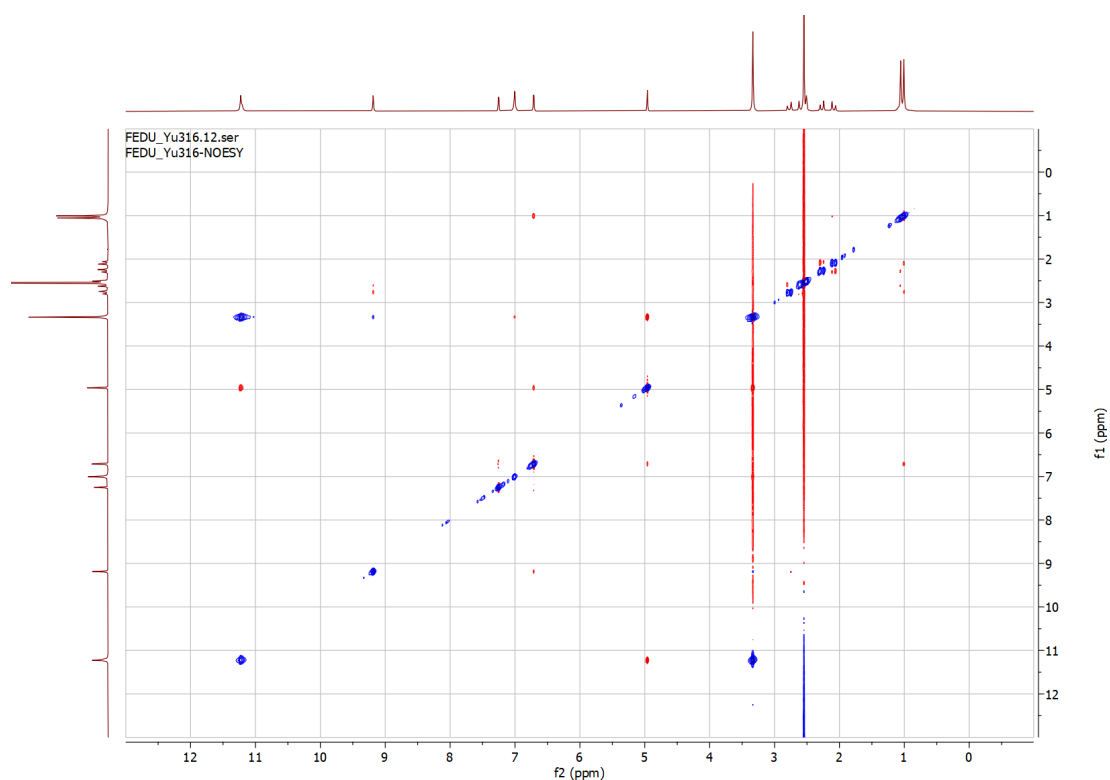

**Figure S19.**  $^1\text{H}$ - $^1\text{H}$  NOESY NMR spectrum of 3-amino-10-(3,5-dichloro-2-hydroxyphenyl)-1-hydroxy-7,7-dimethyl-9-oxo-5,6,7,8,9,10-hexahydrobenzo[*b*][1,6]naphthyridine-4-carbonitrile **3a** in  $\text{DMSO-}d_6$ .

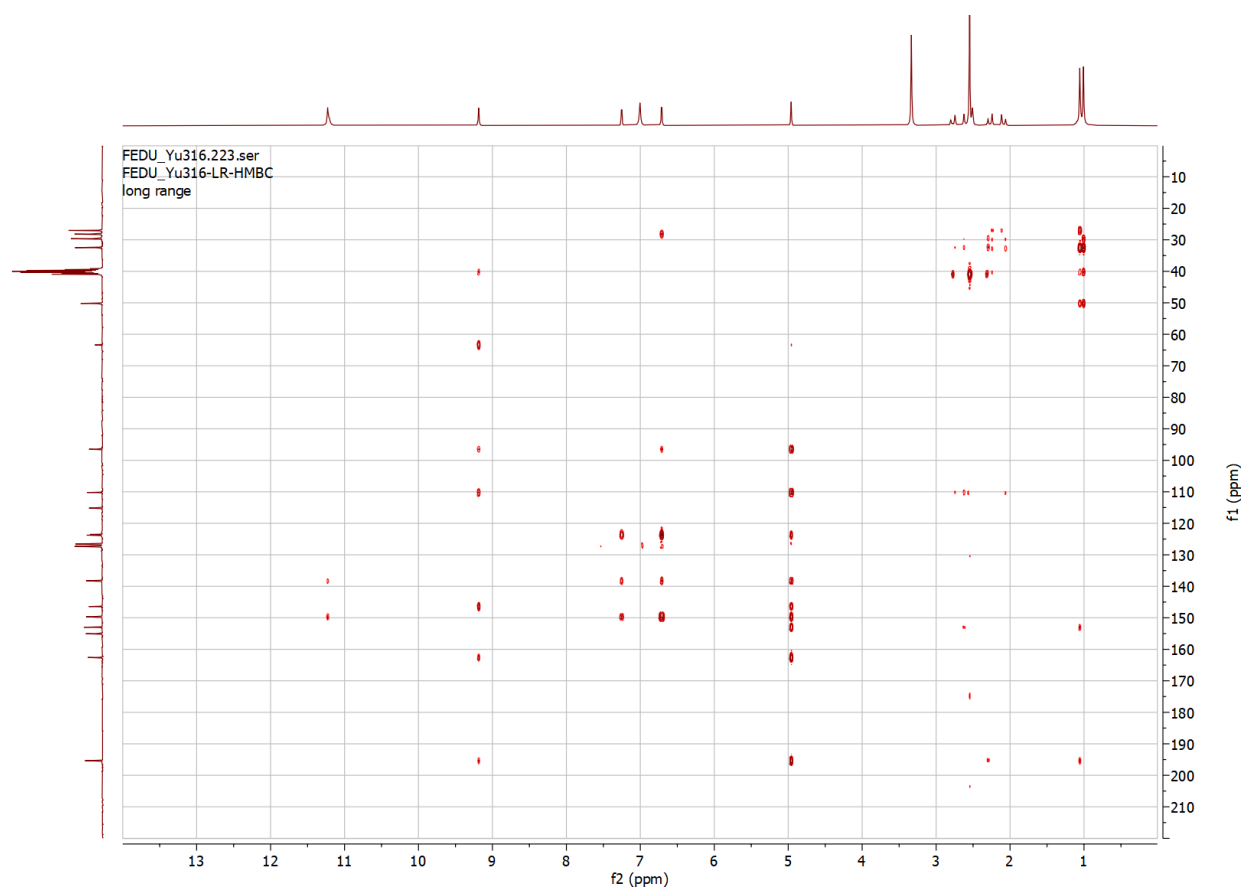

**Figure S20.**  $^1\text{H}$ - $^{13}\text{C}$  HMBC NMR spectrum of 3-amino-10-(3,5-dichloro-2-hydroxyphenyl)-1-hydroxy-7,7-dimethyl-9-oxo-5,6,7,8,9,10-hexahydrobenzo[*b*][1,6]naphthyridine-4-carbonitrile **3a** in  $\text{DMSO-}d_6$ .
